# Supplementary material for: Study protocol: randomised controlled trial evaluating exercise therapy as a supplemental treatment strategy in early multiple sclerosis: the Early Multiple Sclerosis Exercise Study (EMSES)
Source: HighWire-hosted journal article supplement (doi:10.1136/bmjopen-2020-043699), 2021-01-01
Supplement: bmjopen-2020-043699supp001_data_supplement.pdf [file bmjopen-2020-043699supp001_data_supplement.pdf]

## Committees on Health Research Ethics

(S4)

### Informed patient consent for participation in health science research project

Title: Exercise therapy as supplemental treatment strategy early in the disease course of multiple sclerosis.

#### Declaration from the research subject:

I have received sufficient written and oral information on the purpose, methods, pros and cons of the research project to confirm my participation.

I am aware that I voluntarily participate in the research project, and that I at any time can withdraw my consent without comprising current or future rights for relevant treatment.

I hereby give my consent to participate in the research project, and to the storage of my biological material in a research biobank. I have received a copy of this consent form and a copy of the written informations regarding the research project.

Research subject, name: \_\_\_\_\_

Date: \_\_\_\_\_ Signature: \_\_\_\_\_

If new vital health informations are discovered during the research project you will be informed. Do you insist on not having informations on new health informations please mark here: \_\_\_\_\_ (insert x)

Do you want to be informed on the results of the research project and possible consequences for you?

Yes \_\_\_\_\_ (insert x) No \_\_\_\_\_ (insert x)

#### Declaration from the principal investigator

I declare that the research subject has received written and oral information about the research project.

In my opinion sufficient informations on the research project has been given for the research subject to sign the informed consent.

The name on the person tht has delivered the information: \_\_\_\_\_

Date: \_\_\_\_\_ Signature: \_\_\_\_\_

Project identifier: 1-10-72-388-17
