# Supplementary material for: Study protocol: randomised controlled trial evaluating exercise therapy as a supplemental treatment strategy in early multiple sclerosis: the Early Multiple Sclerosis Exercise Study (EMSES)
Source: HighWire-hosted journal article supplement (doi:10.1136/bmjopen-2020-043699), 2021-01-01
Supplement: bmjopen-2020-043699supp003_data_supplement.pdf [file bmjopen-2020-043699supp003_data_supplement.pdf]

**Supplementary material 2:** Retrospective exercise diary.**Retrospective exercise diary (4-week recall)**

Try to recall how many times in the past 4 weeks (from date: \_\_\_\_\_) you have been:

| Exercise modality      | Number of sessions |                           |                             |                 |                    |                    |           | Avg. time per session | Avg. intensity per session |                       |
|------------------------|--------------------|---------------------------|-----------------------------|-----------------|--------------------|--------------------|-----------|-----------------------|----------------------------|-----------------------|
|                        | None               | 1 in the previous 4 weeks | 2-3 in the previous 4 weeks | 1 session/ week | 2-3 sessions/ week | 4-5 sessions/ week | Every day | Minutes               | Intensity (Borg 6-20)      | Intensity (Borg 1-10) |
| Swimming               |                    |                           |                             |                 |                    |                    |           |                       |                            |                       |
| Cycling                |                    |                           |                             |                 |                    |                    |           |                       |                            |                       |
| Running                |                    |                           |                             |                 |                    |                    |           |                       |                            |                       |
| Rowing                 |                    |                           |                             |                 |                    |                    |           |                       |                            |                       |
| Football (soccer)      |                    |                           |                             |                 |                    |                    |           |                       |                            |                       |
| Handball               |                    |                           |                             |                 |                    |                    |           |                       |                            |                       |
| Tennis                 |                    |                           |                             |                 |                    |                    |           |                       |                            |                       |
| Golf                   |                    |                           |                             |                 |                    |                    |           |                       |                            |                       |
| Gymnastics             |                    |                           |                             |                 |                    |                    |           |                       |                            |                       |
| Resistance training    |                    |                           |                             |                 |                    |                    |           |                       |                            |                       |
| Circuit training       |                    |                           |                             |                 |                    |                    |           |                       |                            |                       |
| Yoga                   |                    |                           |                             |                 |                    |                    |           |                       |                            |                       |
| Pilates                |                    |                           |                             |                 |                    |                    |           |                       |                            |                       |
| Other                  |                    |                           |                             |                 |                    |                    |           |                       |                            |                       |
| <b>State modality:</b> |                    |                           |                             |                 |                    |                    |           |                       |                            |                       |
|                        |                    |                           |                             |                 |                    |                    |           |                       |                            |                       |
|                        |                    |                           |                             |                 |                    |                    |           |                       |                            |                       |
|                        |                    |                           |                             |                 |                    |                    |           |                       |                            |                       |

**Supplementary material 2:** Retrospective exercise diary.

| <b>Borg RPE-Scale (6-20)</b> |                  | <b>CR-10 Scale (0-10)</b> |                  |
|------------------------------|------------------|---------------------------|------------------|
| 6                            | No exertion      | 0                         | Nothing at all   |
| 7                            | Extremely light  | 0.5                       | Extremely weak   |
| 8                            |                  | 1                         | Very weak        |
| 9                            | Very light       | 1.5                       |                  |
| 10                           |                  | 2                         | Weak             |
| 11                           | Light            | 2.5                       |                  |
| 12                           |                  | 3                         | Moderate         |
| 13                           | Somewhat hard    | 4                         | Somewhat strong  |
| 14                           |                  | 5                         | Strong           |
| 15                           | Hard             | 6                         |                  |
| 16                           |                  | 7                         | Very strong      |
| 17                           | Very hard        | 8                         |                  |
| 18                           |                  | 9                         |                  |
| 19                           | Extremely hard   | 10                        | Extremely strong |
| 20                           | Maximal exertion | -                         | Maximal          |

Gunnar Borg © 1970, 1985, 1994, 1998
